# Supplementary material for: [NO]- and [NN]-coordination mode rhodium complexes based on a flexible ligand: synthesis, reactivity and catalytic activity
Source: Royal Society of Chemistry journal article supplement (doi:10.1039/c6nj02416e), 2016-01-01

## Supporting Information

### **[NO] and [NN]-Coordination Modes Rhodium Complexes Based on Flexible Ligand: Synthesis, Reactivity and Catalytic Activity**

Zi-Jian Yao\*, Kuan Li, Jian-Yong Zhang and Wei Deng\*

School of Chemical and Environmental Engineering, Shanghai Institute of Technology, Shanghai

201418, China

### $^1\text{H}$ NMR spectrum of **L**

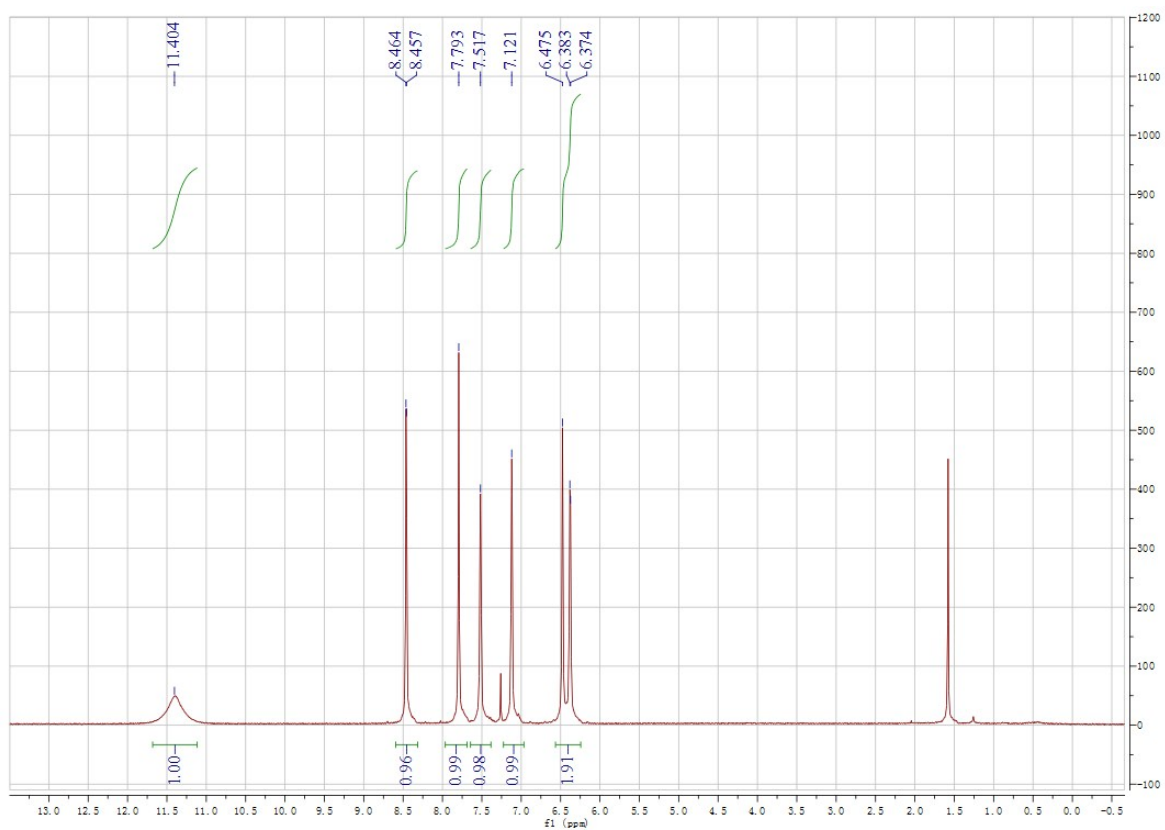

### $^{13}\text{C}$ NMR spectrum of **L**

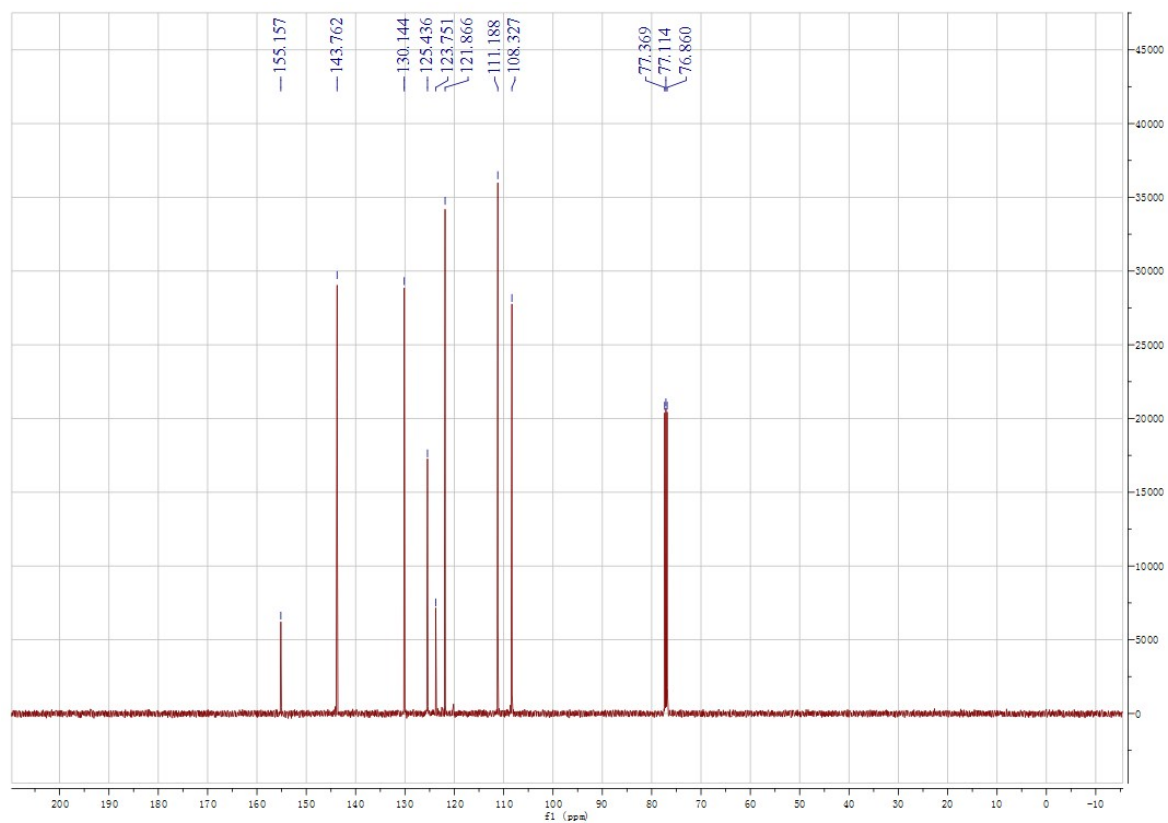

# <sup>1</sup>H NMR spectrum of 1

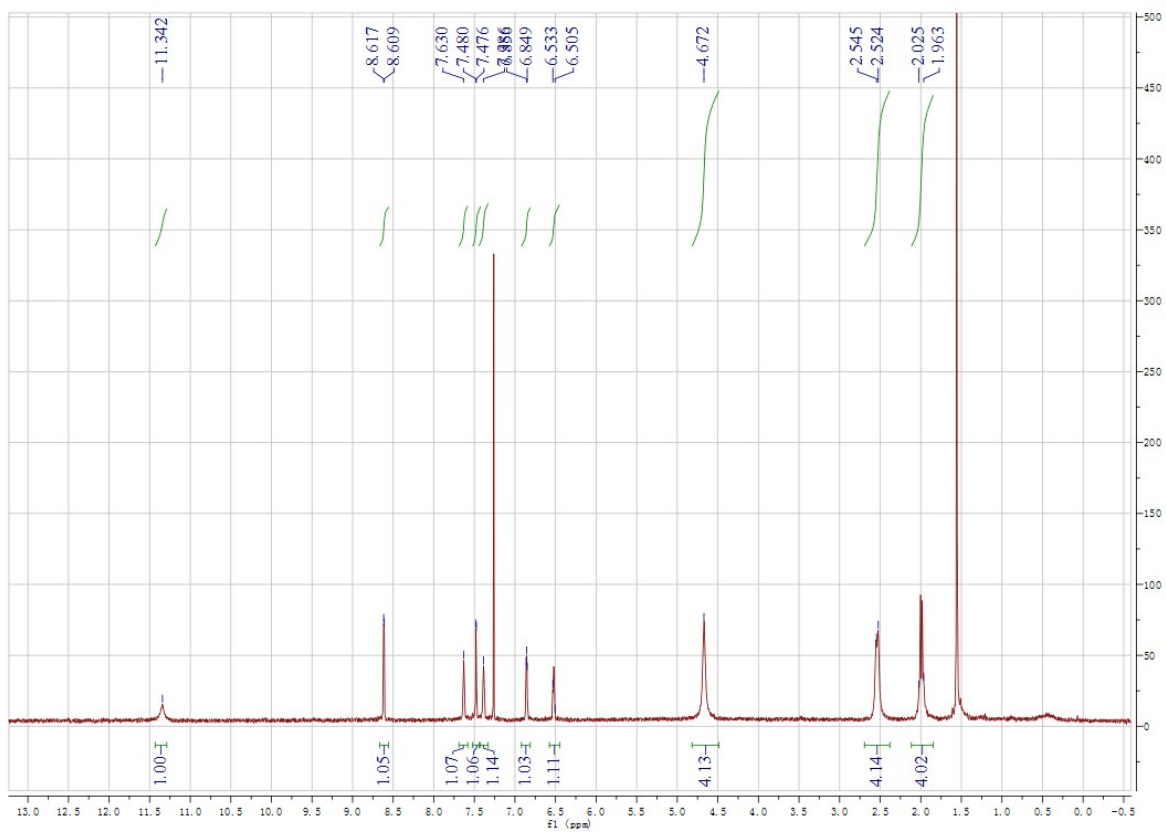

# <sup>1</sup>H NMR spectrum of 2

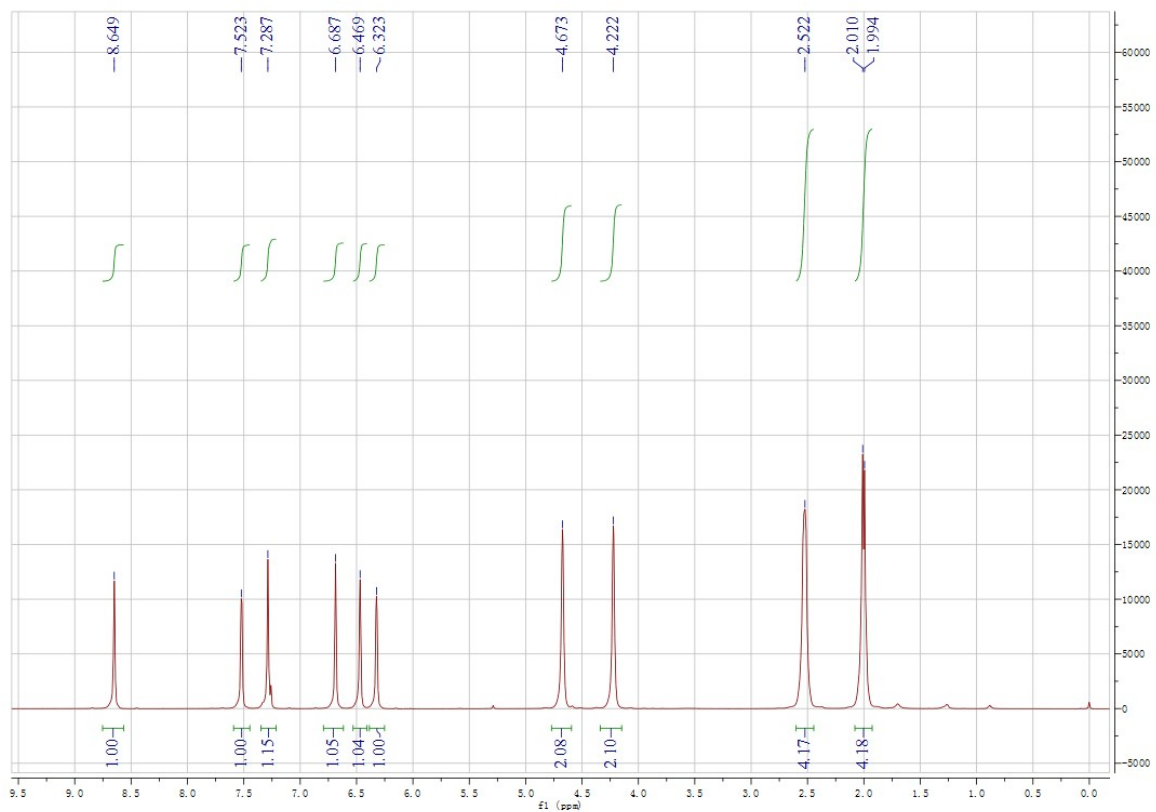

### <sup>13</sup>C NMR spectrum of 2

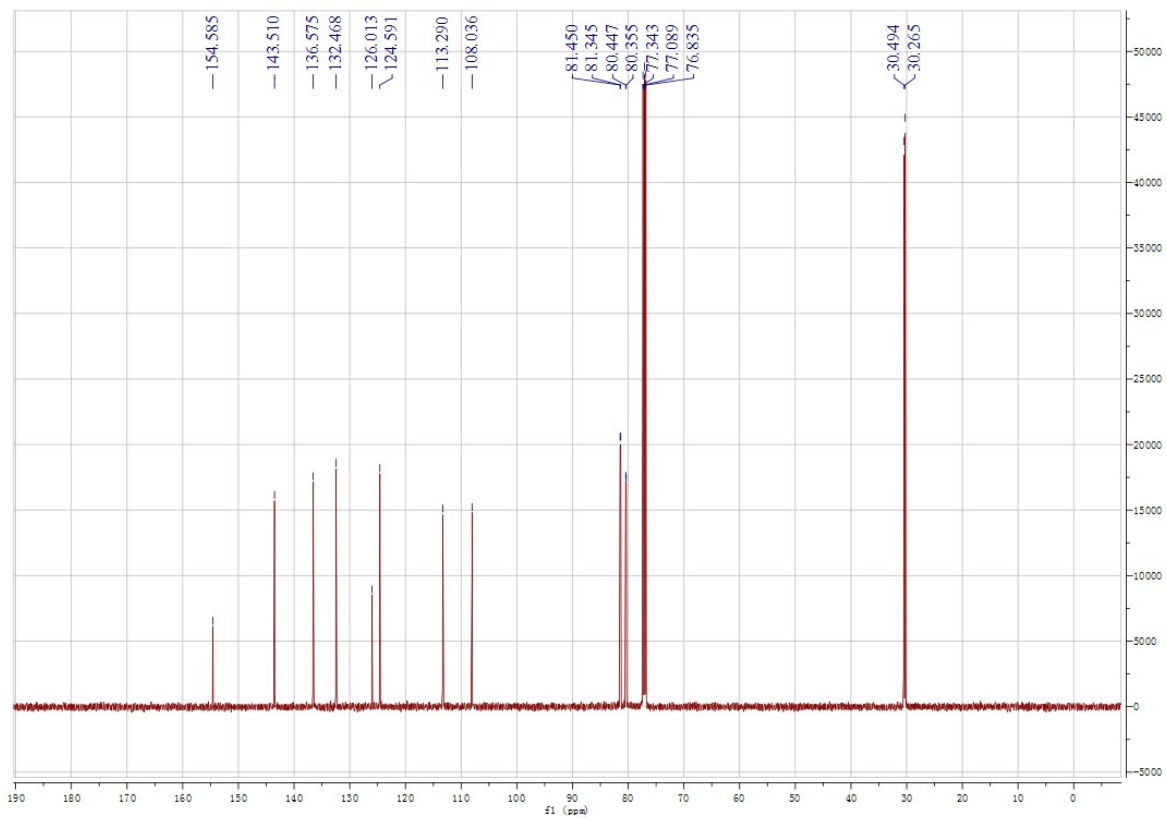

### TGA curves of complex 1 and 2

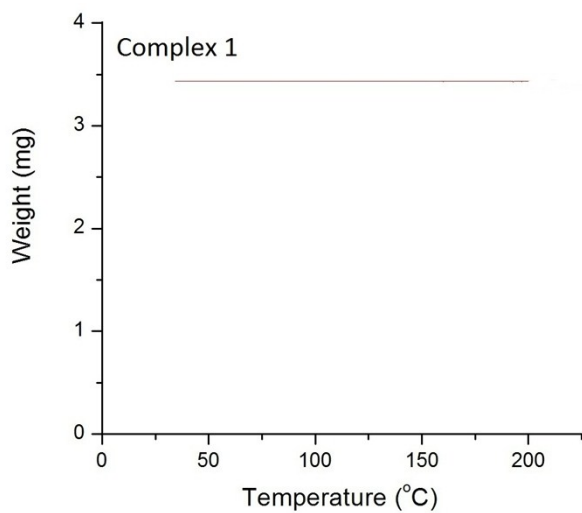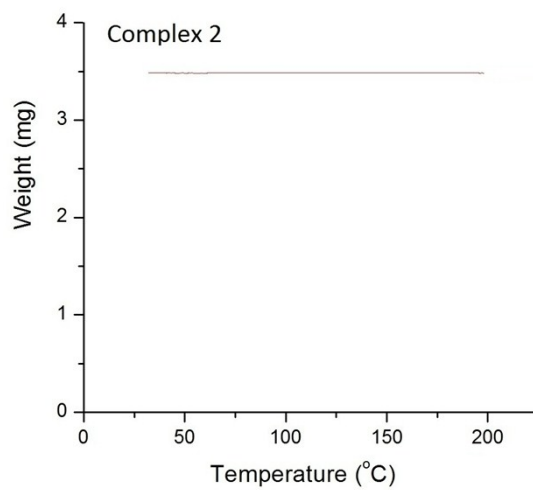

HRMS of complex 1  $[M-BF_4]^+$  peak was found.

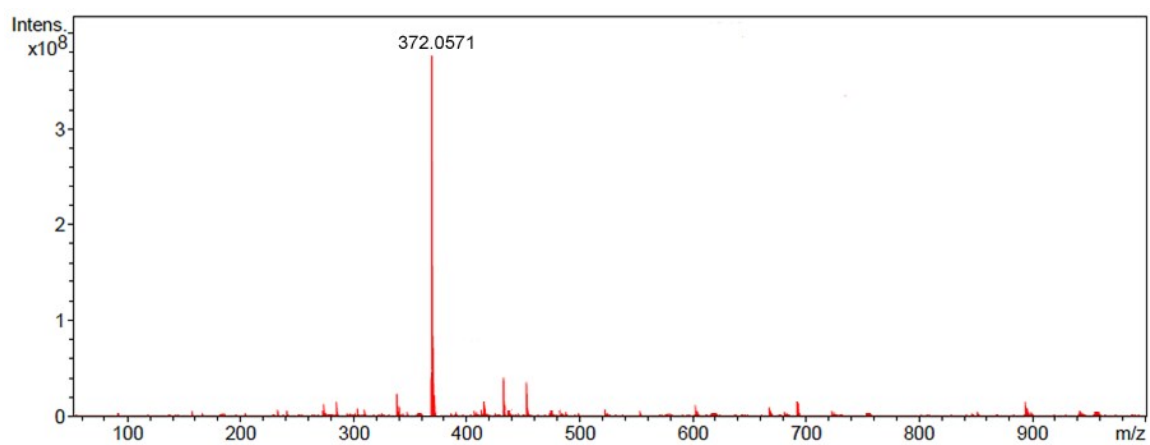

HRMS of complex 2  $[M+H]^+$  peak was found.

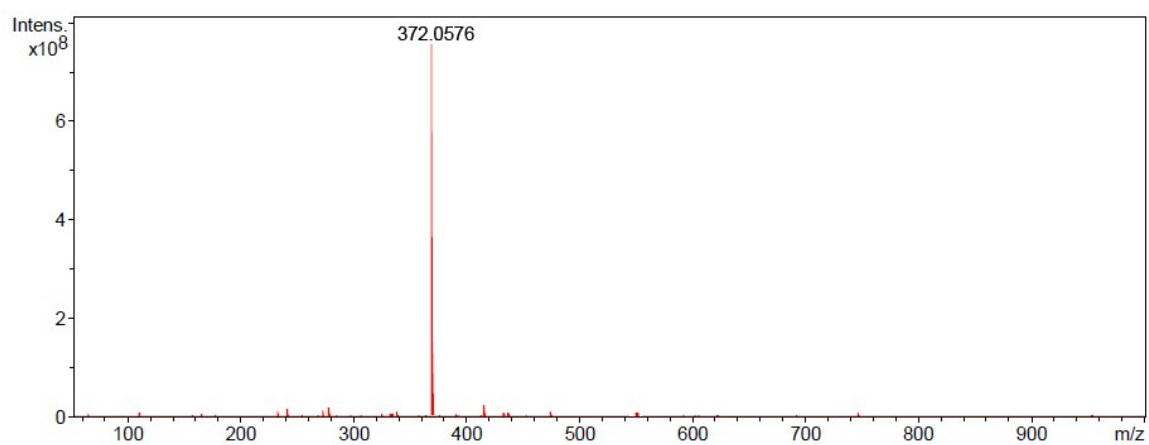

Supplement: c6nj02416e1.pdf [file c6nj02416e1.pdf]
